# Supplementary material
Source: PubMed Central journal article supplement (PMC7181456)
Supplement: NIHMS1567260-supplement-Supplementary_Material.pdf [file NIHMS1567260-supplement-Supplementary_Material.pdf]

1 **Prevention of Early Childhood Asthma and Recurrent Wheeze by Vitamin D and the Role**  
2 **of the 17q21 Genotype: Secondary Analysis of two Randomized Clinical Trials**

3 **Authors:**

4 Rachel S. Kelly, PhD, Bo L. Chawes, MD, Feng Guo PhD, Li Zhang, Kevin Blighe, PhD, Augusto A.  
5 Litonjua, MD, Benjamin A Raby, MD, Bruce D. Levy MD, Daniela Rago, PhD, Jakob Stokholm, MD,  
6 Klaus Bønnelykke, MD, Hans Bisgaard, MD, Xiaobo Zhou PhD, Jessica A. Lasky-Su, ScD; Scott T.  
7 Weiss, MD

8 **CONTENTS**

9 **eMethods**

10 *Study Populations*  
11 *Asthma/Recurrent Wheeze Diagnosis from 0 to 3 Years*  
12 *Genotyping*  
13 *Sphingolipid Metabolism*  
14 *Establishment of ORMDL3-overexpressing stable line*  
15 *Measurement of Sphingosine-1-phosphate levels in a ORMDL3 overexpressing cell line*

16  
17 **eFigures:**

18 **eFigure 1: ORMDL3 overexpression level detection.**

19 **eFigure 2: Kaplan-Meier survival curves showing the effect of the prenatal vitamin D supplement on the**  
20 **offspring's risk of developing asthma/persistent wheeze at age 0 to 3 years in different genotype strata of**  
21 **the 17q21 functional SNP rs12936231 in the COPSAC<sub>2010</sub> and VDAART trials**

22 **eTables:**

23 **eTable 1: Total number of children in VDAART and in COPSAC<sub>2010</sub> and the number included in each of**  
24 **the analyses, together with their baseline characteristics**

25  
26 **eTable 2: Baseline characteristics of the participants from COPSAC<sub>2010</sub> stratified by vitamin D and fish-oil**  
27 **intervention**

28  
29  
30 **eTable 3: Effect of prenatal vitamin D supplementation on development of asthma/persistent wheeze from**  
31 **0 to 3 years in the VDAART and COPSAC<sub>2010</sub> trials stratified by genotype of the 17q21 functional SNP**  
32 **rs12936231; assuming dominance of the G allele**

33  
34 **eTable 4: Mean of blood peak intensity of five key sphingolipid metabolites measured at age six months in**  
35 **441 children from COPSAC<sub>2010</sub> in the placebo and vitamin D groups stratified by 17q21 genotype. C is the**  
36 **risk allele**

37 eTable 5: Results of multivariable interaction models exploring the relationship between a diagnosis of  
38 asthma/recurrent wheeze by age 3 years, the vitamin D intervention, 17q21 genotype and five key  
39 sphingolipids in VDAART. The table shows Beta estimate (p-values) for the individual variables/terms for  
40 a generic model: *asthma/recurrent wheeze~sphingolipid metabolite\* vitamin D intervention\* genotype*

41 eTable 6: Results of multivariable interaction models exploring the relationship between a diagnosis of  
42 asthma/recurrent wheeze by age 3 years, the vitamin D intervention, 17q21 genotype and five key  
43 sphingolipids measured at six months in 441 children from COPSAC<sub>2010</sub>. The table shows Beta estimate  
44 (p-values) for the individual variables/terms for a generic model: *asthma/recurrent wheeze~sphingolipid  
45 metabolite\* vitamin D intervention\* genotype*

46 eTable 7: rs12936231 genotype and asthma status by race in VDAART

47 eTable 8: Combined analysis of effect of prenatal vitamin D supplementation on development of  
48 asthma/persistent wheeze from 0 to 3 years stratified by genotype of the 17q21 functional SNP rs12936231  
49 in Black and in Caucasian/Other subjects from VDAART

50  
51 eTable 9: Association between blood peak intensity of five key sphingolipid metabolites and vitamin D  
52 intervention in VDAART children stratified by 17q21 genotype and race; results shown for ages one and  
53 three combined according to a mixed model

54 eTable 10: Results of multivariable interaction models exploring the relationship between a diagnosis of  
55 asthma/recurrent wheeze by age 3 years, the vitamin D intervention, 17q21 genotype and five key  
56 sphingolipids in VDAART. The table shows Beta estimate (p-values) for the multiinteraction term:  
57 *asthma/recurrent wheeze~sphingolipid metabolite\* vitamin D intervention\* genotype*; with additional  
58 adjustment for or stratification by, race

59 eTable11: Effect of prenatal vitamin D supplementation on development of asthma/persistent wheeze  
60 from 0 to 3 years in the VDAART and COPSAC<sub>2010</sub> trials stratified by genotype of the 17q21 functional  
61 SNP rs12936231; Excluding the children of 256 mothers who additionally received fish-oil  
62 supplementation during pregnancy

63 eTable 12: Association between blood peak intensity of five key sphingolipid metabolites and vitamin D  
64 intervention in VDAART children stratified by 17q21 genotype Excluding the children of 256 mothers  
65 who additionally received fish-oil supplementation during pregnancy; results shown for ages one and  
66 three combined according to a mixed model

67 eTable 13: Results of multivariable interaction models exploring the relationship between a diagnosis of  
68 asthma/recurrent wheeze by age 3 years, the vitamin D intervention, 17q21 genotype and five key  
69 sphingolipids in VDAART. The table shows Beta estimate (p-values) for the multiinteraction term:  
70 *asthma/recurrent wheeze~sphingolipid metabolite\* vitamin D intervention\* genotype*; with additional  
71 adjustment for, or stratification by, race

72

73 **References**

74

75

76

77 **eMethods**

78 **Study Populations**

79  
80 **VDAART:** Pregnant non-smoking women between 10 to 18 weeks of gestation with a history of asthma, eczema, or  
81 allergic rhinitis, or women who conceived the child with a man with a history of such diseases were recruited from  
82 three sites across the USA between October 2009 and July 2011; Boston, San Diego and St Louis.<sup>1</sup> Women were  
83 randomized 1:1 to a daily dose of 4,000 IU vitamin D<sub>3</sub> or a placebo tablet until delivery. All women additionally  
84 received a daily multivitamin containing 400 IU vitamin D<sub>3</sub>. Randomization was performed using an automated  
85 system taking study-site and race into account, and the study was double-blinded. The families were followed post-  
86 delivery by quarterly telephone interviews and yearly in-clinic visits. VDAART was approved by the Institutional  
87 Review Boards (IRB) of the participating Clinical Centers and the Data Coordinating Center, with pregnant women  
88 signing informed consent at the enrollment visit covering both primary and secondary data analyses.

89 **COPSAC<sub>2010</sub>:** Pregnant women between 22 to 26 weeks of gestation were recruited from across Zealand, Denmark  
90 between March 2009 and November 2010, and were randomized 1:1 to a daily dose of 2,400 IU vitamin D<sub>3</sub> or a  
91 placebo until 1 week postpartum.<sup>2</sup> All women also received a multivitamin containing 400 IU vitamin D<sub>3</sub>.  
92 Randomization was performed using a computer-generated list of random numbers, supplied by an external  
93 investigator, and the study was double-blinded. The children were followed at the COPSAC research unit with nine  
94 scheduled clinic visits between the ages of 0 to 3 years, *ad hoc* visits for respiratory symptoms, and by daily diary-  
95 cards. The COPSAC<sub>2010</sub> study was approved by the Local Ethics Committee (H-B-2008-093; H-B-2009-014), the  
96 Danish Data Protection Agency (2008-41-2599), and the Danish Health and Medicines Authority (2612-3959).  
97 Written and oral informed consent for primary and secondary analyses was obtained at enrollment.

98

99 **Asthma/Recurrent Wheeze Diagnosis from 0 to 3 Years:**

100  
101 **VDAART:** the children were diagnosed with asthma/recurrent wheeze using parental reporting of a physician  
102 diagnosis which was based on the following: (1) wheeze after the child's second birthday, preceded by at least one  
103 report of wheeze prior to the second birthday; (2) use of asthma controller medication after the second birthday,  
104 preceded by wheeze before the second birthday; (3) two or more reports of wheeze after the second birthday; (4) at  
105 least one report of wheeze and use of asthma controller medications at distinct visits after the second birthday; or (5)  
106 two distinct reports of use of asthma controller medications after the second birthday.<sup>1</sup>

107 **COPSAC<sub>2010</sub>:** the children were diagnosed with asthma/wheeze by the COPSAC pediatricians based on the clinic  
108 visits and the diary cards, according to a previously validated quantitative symptom algorithm requiring occurrence  
109 of the following: (1) five episodes of troublesome lung symptoms within six months, each lasting at least three  
110 consecutive days; (2) typical asthma symptomatology, including exercise induced symptoms, prolonged nocturnal  
111 cough, and persistent cough outside common cold; (3) need for intermittent use of inhaled  $\beta_2$ -agonist; and (4)  
112 response to a 3-month course of inhaled corticosteroids and relapse upon the termination of treatment.<sup>3; 4</sup>

113 **Genotyping:**

114  
115 **VDAART:** Genotyping was performed using the Illumina Infinium HumanOmniExpressExome Bead chip at  
116 Illumina, San Diego, CA. Genotypes were called with Illumina Genome Studio software. The 17q21 rs12936231  
117 SNP was genotyped on this array. We excluded individuals with an individual genotyping call rate < 0.95 or a sex  
118 mismatch.

119 **COPSAC<sub>2010</sub>:** Genotyping was performed using the Illumina Infinium HumanOmniExpressExome Bead chip at the  
120 AROS Applied Biotechnology AS center, Aarhus, Denmark. Genotypes were called with Illumina Genome Studio  
121 software and rs12936231 was genotyped on this array. We excluded individuals with individual genotyping call rate  
122 < 0.95, sex mismatch, genetic duplicates, outlying heterozygosity > 0.27 and < 0.037, and those individuals not  
123 clustering with the CEU individuals (Utah residents with ancestry from northern and Western Europe) through a  
124 multi-dimensional clustering analyses (MDS) seeded with individuals from the International Hap Map Phase 3.

125 ***Sphingolipid Metabolism:***

126  
127 **VDAART:** Blood was sampled at ages 1 and 3 years at each clinical site and shipped to the Data Coordinating  
128 Center in Boston, where processing and aliquoting was done. Plasma was separated and immediately stored at -80°C  
129 until global metabolomic profiling at Metabolon, Inc., NC.

130 **COPSAC<sub>2010</sub>:** Blood was sampled at 6 months at the clinical research unit, where plasma was separated, aliquoted  
131 and then immediately stored at -80°C at the Danish National Biobank until global metabolomic profiling at  
132 Metabolon, Inc., NC.

133  
134 For both the VDAART and the COPSAC<sub>2010</sub> sample profiling was performed using ultrahigh performance liquid  
135 chromatography-tandem mass spectroscopy (UPLC-MS/MS) and four platforms covering a broad range of the  
136 metabolome: (1) The first aliquot was analyzed using positive ion mode, chromatographically optimized for more  
137 hydrophilic compounds. The extract was gradient eluted from a C18 column (Waters UPLC BEH C18-2.1x100 mm,  
138 1.7 µm) using water and methanol, containing 0.05% perfluoropentanoic acid (PFPA) and 0.1% formic acid (FA);  
139 (2) The second aliquot was also analyzed using positive ion mode, however it was chromatographically optimized  
140 for more hydrophobic compounds. The extract was gradient eluted from the same C18 column as above using  
141 methanol, acetonitrile, water, 0.05% PFPA and 0.01% FA operated at an overall higher organic content; (3) The  
142 third aliquot was analyzed using negative ion mode with a separate dedicated C18 column. The basic extracts were  
143 gradient eluted from the column using methanol and water with 6.5mM ammonium bicarbonate at pH 8; (4) The  
144 fourth aliquot was analyzed via negative ionization following elution from HILIC column (Waters UPLC BEH  
145 Amide 2.1x150 mm, 1.7 µm) using a gradient consisting of water and acetonitrile with 10mM ammonium formate,  
146 pH 10.8. Metabolites were analyzed as measured LC-MS peak areas. In VDAART, data were processed in two  
147 batches sent six months apart (batch one n=245; batch two n=688) sent six months apart then merged and scaled  
148 together based on equivalence of the control groups. If a metabolite had a missingness of 50% or greater in either  
149 dataset it was excluded from further analysis. The COPSAC<sub>2010</sub> data underwent the standard metabolomic QC  
150 pipeline<sup>3,66-68</sup>; metabolites with a signal-to-noise ratio <10 were considered unquantifiable and excluded, as were  
151 metabolites with undetectable/missing levels for >10% of the samples. All remaining missing values were imputed  
152 with the half the minimum peak intensity for that metabolite across the whole population, then data were pareto  
153 scaled to account for the differences in the scales of measurements across the metabolome. In both datasets  
154 metabolites were log-transformed to create approximately Gaussian distributions and to stabilize variance.

155  
156 Metabolites were identified by their mass-to-charge ratio (m/z), retention time (rt), and through a comparison to  
157 library entries of purified known standards. From the metabolomic profiles, we extracted five metabolites from the  
158 sphingolipid metabolism pathway which were measured and passed QC in our metabolomic dataset. Sphingosine-1-  
159 phosphate (HMDB00277) has been shown to be one of the most important sphingolipid metabolites for airway  
160 hyperresponsiveness, mast cell activation and inflammation in mechanistic asthma models.<sup>5-7</sup> To further characterize  
161 the sphingolipid metabolism pathway downstream of the *ORMDL3*-regulated rate limiting SPT enzyme, we also  
162 analyzed levels of Sphinganine (HMDB00269), Sphinganine-1-phosphate (HMDB01383), Phosphoethanolamine  
163 (HMDB00224) and Sphingosine (HMDB00252).

164  
165 ***Establishment of *ORMDL3*-overexpressing stable line***

166  
167 Experiments were conducted in 16HBE cells purchased from ATCC. *ORMDL3* was stably overexpressed in 16HBE  
168 cells using a lenti-viral system. An *ORMDL3* Human Tagged open reading frame (ORF) clone in lentiviral particles  
169 was obtained from Origene (RC202279L3V). For lenti-viral transduction,  $5 \times 10^4$  cells were seeded in 48-well  
170 plates, and lenti-virus was added to the cells in the presence of 8 µg/ml polybrene (Millipore, TR-1003-G)  
171 overnight. After puromycin selection, the overexpression of *ORMDL3* was determined by qPCR and Western blot  
172 analysis (**eFigure 1**).

173 ***Measurement of Sphingosine-1-phosphate levels in a *ORMDL3* overexpressing cell line:***

174 In order to determine whether there are functional implications of vitamin D treatment and *ORMDL3* expression on  
175 the levels of Sphingosine-1-phosphate, we treated 16HBE cells with or without overexpression of *ORMDL3*.

176 To quantify sphingosine-1-phosphate the cells were plated into 12-well plates at  $4 \times 10^5$  cells/well. After 24 hours,  
177 the cells were starved overnight, then treated with  $1\alpha,25$ -vitamin D3 (Sigma-Aldrich) at three different  
178 concentrations (0nM, 0.1nM and 1nM) for 10 hours. The levels of sphingosine-1-phosphate were subsequently  
179 quantitated by ELISA (MyBioSource). Independent ELISA were performed three times. The concentrations in the  
180 *ORMDL3* overexpressed cell line and the controls were compared to determine whether overexpression of *ORMDL3*  
181 reduced the ability of vitamin D to generate increased sphingolipid levels. An unpaired Students t-test was used to  
182 compare levels of Sphingosine-1-phosphate between the control and the *ORMDL3* overexpressed lines, at the three  
183 different vitamin d treatment levels 0nM, 0.1nM and 1nM.  
184  
185  
186  
187  
188  
189  
190  
191  
192  
193  
194  
195  
196  
197  
198  
199  
200  
201  
202  
203  
204  
205  
206  
207  
208  
209  
210  
211  
212  
213  
214  
215  
216  
217  
218  
219  
220  
221  
222  
223  
224  
225  
226  
227  
228  
229  
230  
231

232 **eFigures:**

233 **eFigure1: ORMDL3 overexpression level detection.** ORMDL3 overexpression level was detected by (A) mRNA  
234 level (RT-PCR) (Mean and SD was shown), and (B) protein level (western blot). \* indicates  $p < 0.05$ , according to  
235 the unpaired Student's  $t$  test.

236 **A**

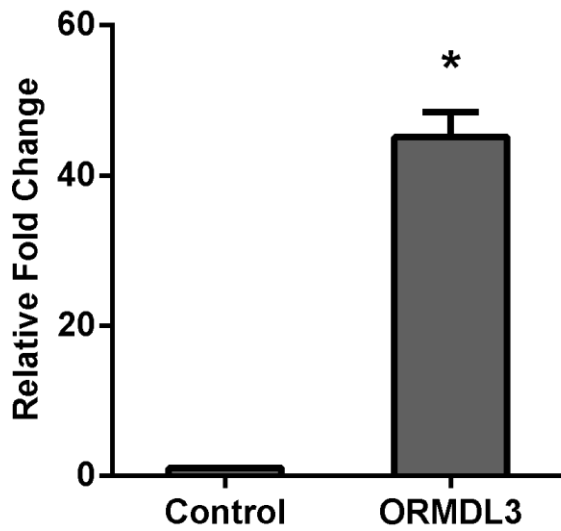

237

238 **B**

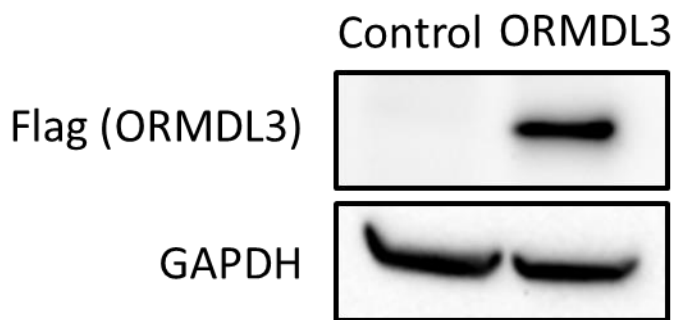

239

240

241

242

243 eFigure 2: Kaplan-Meier survival curves showing the effect of the prenatal vitamin D supplement on the  
 244 offspring's risk of developing asthma/persistent wheeze at age 0 to 3 years in different genotype strata of the  
 245 17q21 functional SNP rs12936231 in the COPSAC<sub>2010</sub> and VDAART trials

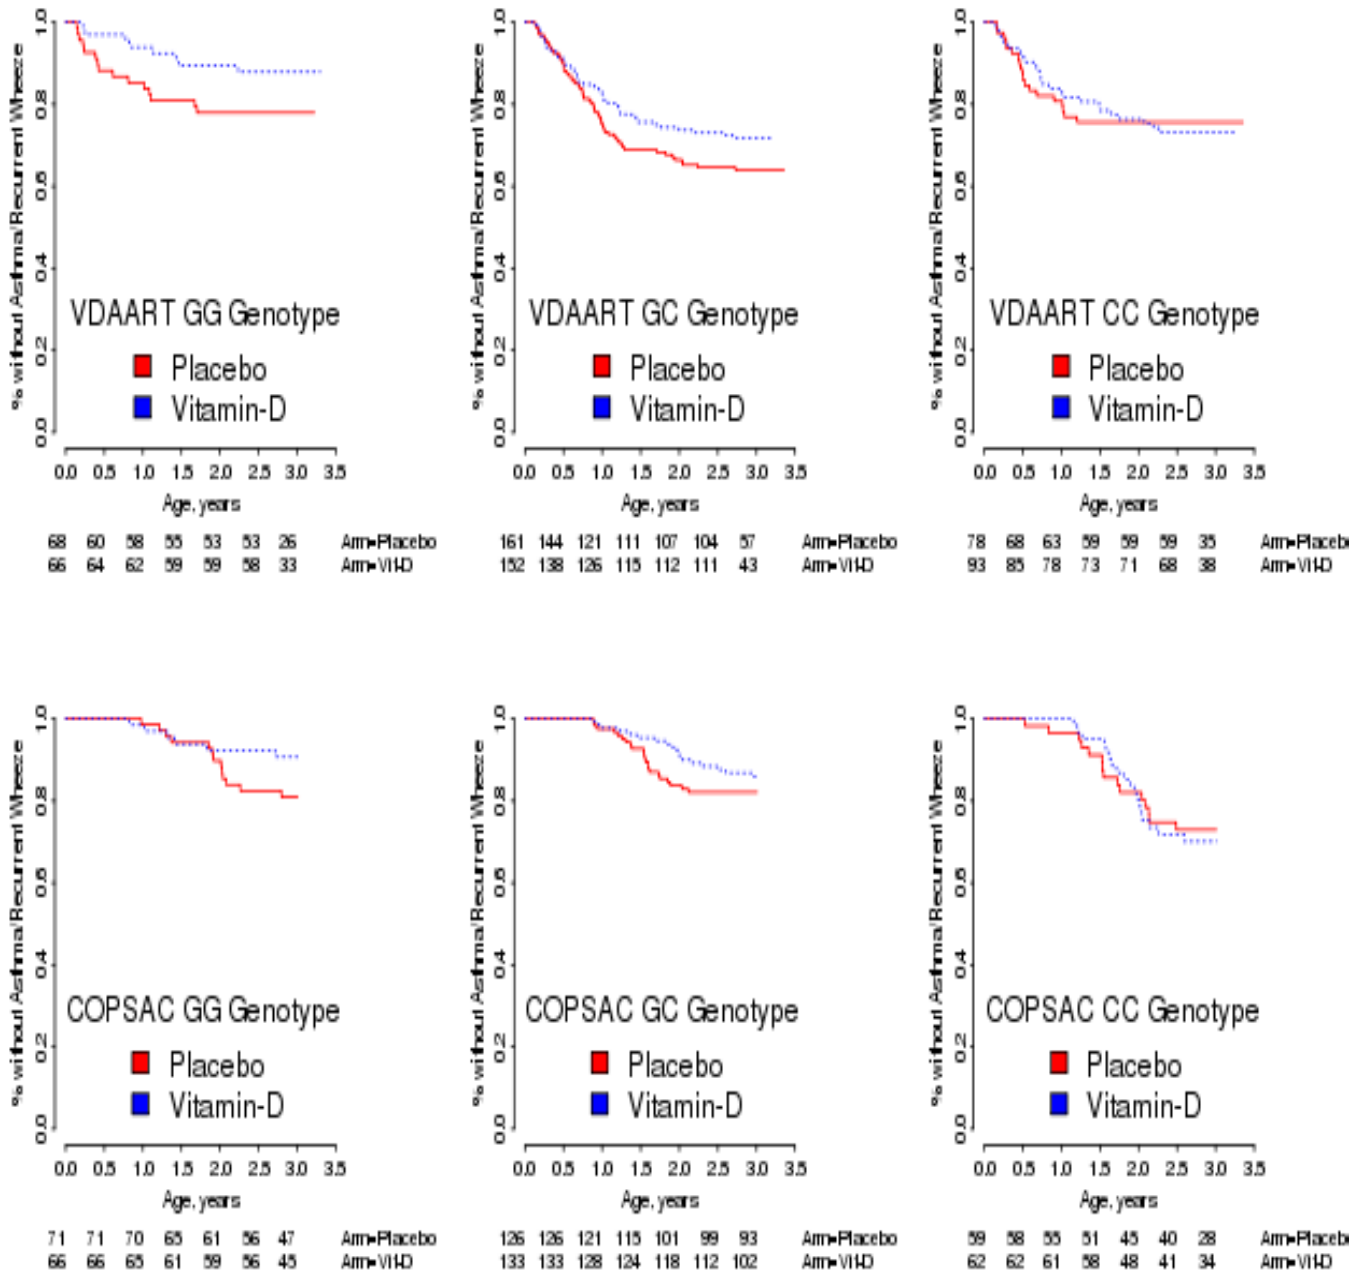

246

247 *Numbers at risk in the Placebo and Vitamin D arm are shown underneath the x-axis*

248

## 249 eTables:

250 eTable 1: Total number of children in VDAART and in COPSAC<sub>2010</sub> and the number included in each of the analyses, together with their baseline  
251 characteristics

| Characteristic                      | VDAART                   |       |                             |       |                                          |       |                                             |       | COPSAC                   |        |                             |        |                                             |        |
|-------------------------------------|--------------------------|-------|-----------------------------|-------|------------------------------------------|-------|---------------------------------------------|-------|--------------------------|--------|-----------------------------|--------|---------------------------------------------|--------|
|                                     | Total Population (n=806) |       | Genotype Population (n=618) |       | Age One Yr Metabolite Population (n=413) |       | Age Three Yrs Metabolite Population (n=353) |       | Total Population (n=581) |        | Genotype Population (n=517) |        | Age Six Month Metabolite Population (n=441) |        |
|                                     | n                        | %     | n                           | %     | n                                        | %     | n                                           | %     | n                        | %      | n                           | %      | n                                           | %      |
| <b>rs12936231, N (%)</b>            |                          |       |                             |       |                                          |       |                                             |       |                          |        |                             |        |                                             |        |
| <b>CC</b>                           | 188                      | 23.3% | 171                         | 27.7% | 112                                      | 27.1% | 106                                         | 30.0% | 121                      | 20.8%  | 121                         | 23.4%  | 97                                          | 22.0%  |
| <b>GC</b>                           | 350                      | 43.4% | 313                         | 50.6% | 221                                      | 53.5% | 172                                         | 48.7% | 259                      | 44.6%  | 259                         | 50.1%  | 229                                         | 51.9%  |
| <b>GG</b>                           | 151                      | 18.7% | 134                         | 21.7% | 80                                       | 19.4% | 75                                          | 21.2% | 137                      | 23.6%  | 137                         | 26.5%  | 115                                         | 26.1%  |
| <b>missing</b>                      | 117                      | 14.5% | 0                           | 0.0%  | 0                                        | 0.0%  | 0                                           | 0.0%  | 64                       | 11.0%  | 0                           | 0.0%   | 0                                           | 0.0%   |
| <b>Study Arm, N (%)</b>             |                          |       |                             |       |                                          |       |                                             |       |                          |        |                             |        |                                             |        |
| <b>Placebo</b>                      | 401                      | 49.8% | 307                         | 49.7% | 211                                      | 51.1% | 174                                         | 49.3% | 286                      | 49.2%  | 256                         | 49.5%  | 213                                         | 48.3%  |
| <b>Vitamin D</b>                    | 405                      | 50.2% | 311                         | 50.3% | 202                                      | 48.9% | 179                                         | 50.7% | 295                      | 50.8%  | 261                         | 50.5%  | 228                                         | 51.7%  |
| <b>Asthma/wheeze, 0-3yrs, N (%)</b> |                          |       |                             |       |                                          |       |                                             |       |                          |        |                             |        |                                             |        |
| <b>No</b>                           | 530                      | 65.8% | 450                         | 72.8% | 287                                      | 69.5% | 264                                         | 74.8% | 477                      | 82.1%  | 425                         | 82.2%  | 358                                         | 81.2%  |
| <b>Yes</b>                          | 218                      | 27.0% | 168                         | 27.2% | 126                                      | 30.5% | 89                                          | 25.2% | 104                      | 17.9%  | 92                          | 17.8%  | 83                                          | 18.8%  |
| <b>missing</b>                      | 58                       | 7.2%  | 0                           | 0.0%  | 0                                        | 0.0%  | 0                                           | 0.0%  | 0                        | 0.0%   | 0                           | 0.0%   | 0                                           | 0.0%   |
| <b>Sex, N (%)</b>                   |                          |       |                             |       |                                          |       |                                             |       |                          |        |                             |        |                                             |        |
| <b>Male</b>                         | 421                      | 52.2% | 321                         | 51.9% | 218                                      | 52.8% | 187                                         | 53.0% | 298                      | 51.3%  | 269                         | 52.0%  | 227                                         | 51.5%  |
| <b>Female</b>                       | 385                      | 47.8% | 297                         | 48.1% | 195                                      | 47.2% | 166                                         | 47.0% | 283                      | 48.7%  | 248                         | 48.0%  | 214                                         | 48.5%  |
| <b>Race, N (%)</b>                  |                          |       |                             |       |                                          |       |                                             |       |                          |        |                             |        |                                             |        |
| <b>Black</b>                        | 390                      | 48.4% | 290                         | 46.9% | 195                                      | 47.2% | 168                                         | 47.6% | 0                        | 0.0%   | 0                           | 0.0%   | 0                                           | 0.0%   |
| <b>Caucasian</b>                    | 265                      | 32.9% | 200                         | 32.4% | 134                                      | 32.4% | 113                                         | 32.0% | 581                      | 100.0% | 517                         | 100.0% | 441                                         | 100.0% |
| <b>Other</b>                        | 151                      | 18.7% | 128                         | 20.7% | 84                                       | 20.3% | 72                                          | 20.4% | 0                        | 0.0%   | 0                           | 0.0%   | 0                                           | 0.0%   |

252



253 **eTable 2: Baseline characteristics of the participants from COPSAC<sub>2010</sub> stratified by vitamin D and fish-oil**  
 254 **intervention**  
 255

| Characteristic           | Vitamin D Only (n=128) | Fish Oil Only (n=123) | Vitamin D + Fish Oil (n=133) | Placebo Only (n=133) | p-value |
|--------------------------|------------------------|-----------------------|------------------------------|----------------------|---------|
| <b>rs12936231, N (%)</b> |                        |                       |                              |                      |         |
| <b>CC</b>                | 24 (18.8)              | 26 (21.1)             | 38 (28.6)                    | 33 (24.8)            | 0.411   |
| <b>GC</b>                | 71 (55.5)              | 58 (47.2)             | 62 (46.6)                    | 68 (51.1)            |         |
| <b>GG</b>                | 33 (25.8)              | 39 (31.7)             | 33 (24.8)                    | 32 (24.1)            |         |
| <b>Sex, N (%)</b>        |                        |                       |                              |                      |         |
| <b>Male</b>              | 74 (57.8)              | 62 (50.4)             | 67 (50.4)                    | 66 (49.6)            | 0.513   |
| <b>Female</b>            | 54 (42.2)              | 61 (49.6)             | 66 (49.6)                    | 67 (50.4)            |         |

256  
 257  
 258  
 259  
 260  
 261  
 262  
 263  
 264

**eTable 3: Effect of prenatal vitamin D supplementation on development of asthma/persistent wheeze from 0 to 3 years in the VDAART and COPSAC<sub>2010</sub> trials stratified by genotype of the 17q21 functional SNP rs12936231; assuming dominance of the G allele**

| Vitamin D vs placebo | VDAART<br>N=618 |                              | COPSAC <sub>2010</sub><br>N=517 |                              | Combined analysis            |
|----------------------|-----------------|------------------------------|---------------------------------|------------------------------|------------------------------|
|                      | total/<br>cases | HR (95% CI),<br>p-value      | total/<br>cases                 | HR (95% CI),<br>p-value      |                              |
| rs12936231           |                 |                              |                                 |                              | HR (95% CI),<br>p-value      |
| GG/GC                | 447/124         | 0.69 (0.48-0.98),<br>p=0.041 | 396/59                          | 0.65 (0.39-1.09),<br>p=0.103 | 0.68 (0.50-0.91),<br>p=0.009 |
| CC                   | 171/44          | 1.07 (0.59-1.95),<br>p=0.821 | 121/33                          | 1.08 (0.55-2.15),<br>p=0.822 | 1.08 (0.69-1.69),<br>p=0.751 |

265  
 266  
 267  
 268  
 269  
 270  
 271

272 **eTable 4: Mean of blood peak intensity of five key sphingolipid metabolites measured at age six months in 441**  
 273 **children from COPSAC<sub>2010</sub> in the placebo and vitamin D groups stratified by 17q21 genotype. C is the risk**  
 274 **allele**

|                                | Six Month Samples |                 |         |
|--------------------------------|-------------------|-----------------|---------|
|                                | Coefficient       | 95% CI          | p value |
| <b>sphinganine-1-phosphate</b> |                   |                 |         |
| CC                             | 0.031             | (-0.117,0.180)  | 0.679   |
| GC                             | -0.115            | (-0.224,-0.006) | 0.039*  |
| GG                             | 0.005             | (-0.164,0.173)  | 0.958   |
| <b>sphinganine</b>             |                   |                 |         |
| CC                             | 0.056             | (-0.173,0.286)  | 0.630   |
| GC                             | 0.009             | (-0.123,0.142)  | 0.893   |
| GG                             | 0.07              | (-0.137,0.278)  | 0.508   |
| <b>sphingosine-1-phosphate</b> |                   |                 |         |
| CC                             | 0.023             | (-0.118,0.165)  | 0.746   |
| GC                             | -0.104            | (-0.204,-0.004) | 0.043*  |
| GG                             | -0.04             | (-0.19,0.11)    | 0.601   |
| <b>sphingosine</b>             |                   |                 |         |
| CC                             | -0.017            | (-0.239,0.205)  | 0.882   |
| GC                             | -0.012            | (-0.165,0.141)  | 0.873   |
| GG                             | 0.018             | (-0.191,0.226)  | 0.869   |
| <b>phosphoethanolamine</b>     |                   |                 |         |
| CC                             | 0.105             | (-0.053,0.264)  | 0.196   |
| GC                             | -0.04             | (-0.151,0.07)   | 0.476   |
| GG                             | 0.058             | (-0.099,0.215)  | 0.471   |

275 *CC n=97 (22%); GC n=229(52%); GG n=115 (26%)*

276 *\*Significant at the 95% Confidence interval*

277 **eTable 5: Results of multivariable interaction models exploring the relationship between a diagnosis of asthma/recurrent wheeze by age 3 years, the**  
 278 **vitamin D intervention, 17q21 genotype and five key sphingolipids in VDAART. The table shows Beta estimate (p-values) for the individual**  
 279 **variables/terms for a generic model: *asthma/recurrent wheeze~sphingolipid metabolite\* vitamin D intervention\* genotype***

|                                                                | <b>sphinganine-1-phosphate</b> | <b>sphinganine</b>    | <b>phosphoethanolamine</b> | <b>sphingosine</b>   | <b>sphingosine-1-phosphate</b> |
|----------------------------------------------------------------|--------------------------------|-----------------------|----------------------------|----------------------|--------------------------------|
| <b>AGE ONE SAMPLES</b>                                         |                                |                       |                            |                      |                                |
| Sphingolipid Metabolite                                        | -9.26 (0.009*)                 | 0.16 (0.893)          | -4.04 (0.082)              | 0.04 (0.976)         | -14.02 (0.019*)                |
| Vitamin D Intervention                                         | -3.92 (0.005*)                 | -0.77 (0.314)         | -3.20 (0.005*)             | -0.79 (0.369)        | -5.52 (0.017*)                 |
| rs12936231 genotype                                            | -1.65 (0.040*)                 | 0.10 (0.803)          | -0.36 (0.554)              | 0.13 (0.773)         | -2.62 (0.076.)                 |
| Vitamin D Intervention*sphingolipid metabolite                 | 11.43 (0.008*)                 | 1.12 (0.541)          | 8.40 (0.008*)              | 1.15 (0.581)         | 16.64 (0.023*)                 |
| Vitamin D Intervention*rs12936231 genotype                     | 2.70 (0.013*)                  | 0.56 (0.377)          | 2.03 (0.024*)              | 0.40 (0.581)         | 3.97 (0.034*)                  |
| rs12936231 genotype*Sphingolipid metabolite                    | 5.66 (0.020*)                  | 0.02 (0.987)          | 1.60 (0.364)               | -0.05 (0.960)        | 8.75 (0.059.)                  |
| <b>Vitamin D Intervention*rs12936231 genotype*sphingolipid</b> | <b>-8.15 (0.011*)</b>          | <b>-1.27 (0.425)</b>  | <b>-5.72 (0.022*)</b>      | <b>-0.74 (0.675)</b> | <b>-12.35 (0.035*)</b>         |
| <b>AGE THREE SAMPLES</b>                                       |                                |                       |                            |                      |                                |
| Sphingolipid Metabolite                                        | -4.57 (0.133)                  | -1.13 (0.501)         | 0.06 (0.986)               | -0.24 (0.898)        | -3.16 (0.483)                  |
| Vitamin D Intervention                                         | -2.89 (0.049*)                 | -1.74 (0.092)         | -1.81 (0.247)              | -1.47 (0.185)        | -3.79 (0.078)                  |
| rs12936231 genotype                                            | -0.63 (0.359)                  | -0.29 (0.563)         | -0.05 (0.948)              | -0.12 (0.830)        | -0.34 (0.721)                  |
| Vitamin D Intervention*sphingolipid metabolite                 | 6.55 (0.126)                   | 2.37 (0.304)          | 2.79 (0.565)               | 1.64 (0.522)         | 9.68 (0.153)                   |
| Vitamin D Intervention*rs12936231 genotype                     | 2.33 (0.031*)                  | 1.73 (0.024*)         | 2.51 (0.039*)              | 1.55 (0.060)         | 3.06 (0.050*)                  |
| rs12936231 genotype*sphingolipid metabolite                    | 2.58 (0.216)                   | 1.20 (0.320)          | 0.68 (0.789)               | 0.72 (0.589)         | 1.73 (0.586)                   |
| <b>Vitamin D Intervention*rs12936231 genotype*sphingolipid</b> | <b>-6.12 (0.050*)</b>          | <b>-3.66 (0.040*)</b> | <b>-6.84 (0.074)</b>       | <b>-3.19 (0.106)</b> | <b>-8.84 (0.076)</b>           |

\*Significant at the 95% Confidence interval

280  
281  
282

283 eTable 6: Results of multivariable interaction models exploring the relationship between a diagnosis of asthma/recurrent wheeze by age 3 years, the  
 284 vitamin D intervention, 17q21 genotype and five key sphingolipids measured at six months in 441 children from COPSAC<sub>2010</sub>. The table shows Beta  
 285 estimate (p-values) for the individual variables/terms for a generic model: *asthma/recurrent wheeze~sphingolipid metabolite\* vitamin D intervention\**  
 286 *genotype*

|                                                                           | <b>Sphinganine-1-phosphate</b> | <b>Sphinganine</b> | <b>Phosphoethanolamine</b> | <b>Sphingosine</b> | <b>Sphingosine-1-phosphate</b> |
|---------------------------------------------------------------------------|--------------------------------|--------------------|----------------------------|--------------------|--------------------------------|
| <b>Sphingolipid Metabolite</b>                                            | 0.12 (0.867)                   | -0.27 (0.573)      | 0.62 (0.419)               | 0.44 (0.372)       | 0.48 (0.539)                   |
| <b>Vitamin D Intervention</b>                                             | -1.13 (0.019*)                 | -1.14 (0.020*)     | -1.14 (0.018*)             | -1.14 (0.018*)     | -1.12 (0.021*)                 |
| <b>rs12936231 genotype</b>                                                | 0.10 (0.684)                   | 0.09 (0.716)       | 0.11 (0.659)               | 0.06 (0.793)       | 0.10 (0.674)                   |
| <b>Vitamin D Intervention*Sphingolipid metabolite</b>                     | 0.03 (0.981)                   | -0.03 (0.973)      | -0.22 (0.852)              | -0.27 (0.758)      | -0.07 (0.955)                  |
| <b>Vitamin D Intervention*rs12936231 genotype</b>                         | 0.72 (0.051)                   | 0.74 (0.047*)      | 0.72 (0.052)               | 0.75 (0.044*)      | 0.72 (0.053)                   |
| <b>rs12936231 genotype*Sphingolipid metabolite</b>                        | 0.09 (0.878)                   | 0.57 (0.171)       | -0.28 (0.670)              | 0.07 (0.860)       | -0.10 (0.873)                  |
| <b>Vitamin D Intervention*rs12936231 genotype*Sphingolipid metabolite</b> | -0.33 (0.717)                  | -0.76 (0.244)      | -0.30 (0.750)              | -0.29 (0.660)      | -0.31 (0.756)                  |

287 \*Significant at the 95% Confidence interval

288 eTable 7: rs12936231 genotype and asthma status by race in VDAART

|                          |           | No Asthma/wheeze, 0-3yrs | Asthma/wheeze, 0-3yrs | Total      |
|--------------------------|-----------|--------------------------|-----------------------|------------|
|                          |           | N (%)                    | N (%)                 | N (%)      |
| <b>Black (n=290)</b>     | <b>CC</b> | 51 (26.7)                | 22 (22.2)             | 73 (25.2)  |
|                          | <b>GC</b> | 81 (42.4)                | 64 (64.6)             | 145 (50.0) |
|                          | <b>GG</b> | 59 (30.9)                | 13 (13.1)             | 72 (24.8)  |
| <b>Caucasian (n=200)</b> | <b>CC</b> | 35 (22.9)                | 14 (29.8)             | 49 (24.5)  |
|                          | <b>GC</b> | 82 (53.6)                | 24 (51.1)             | 106 (53.0) |
|                          | <b>GG</b> | 36 (23.5)                | 9 (19.1)              | 45 (22.5)  |
| <b>Other (n=128)</b>     | <b>CC</b> | 41 (38.7)                | 8 (36.4)              | 49 (38.3)  |
|                          | <b>GC</b> | 49 (46.2)                | 13 (59.1)             | 62 (48.4)  |
|                          | <b>GG</b> | 16 (15.1)                | 1 (4.5)               | 17 (13.3)  |

289

290 eTable 8: Combined analysis of effect of prenatal vitamin D supplementation on development of  
 291 asthma/persistent wheeze from 0 to 3 years stratified by genotype of the 17q21 functional SNP rs12936231 in  
 292 Black and in Caucasian/Other subjects from VDAART  
 293

| Vitamin D vs placebo | African American |                           | Caucasian+Other |                           | Combined analysis         |
|----------------------|------------------|---------------------------|-----------------|---------------------------|---------------------------|
|                      | N=290            |                           | N=328           |                           |                           |
| rs12936231 strata    | total/cases      | HR (95% CI), p-value      | total/cases     | HR (95% CI), p-value      | HR (95% CI), p-value      |
| GG                   | 72/13            | 0.29 (0.08-1.07), p=0.063 | 62/10           | 0.90 (0.26-3.14), p=0.880 | 0.53 (0.22-1.29), p=0.163 |
| GC                   | 145/64           | 0.83 (0.50-1.35), p=0.449 | 168/37          | 0.66 (0.34-1.28), p=0.219 | 0.76 (0.51-1.14), p=0.179 |
| CC                   | 73/22            | 1.29 (0.54-3.09), p=0.560 | 98/22           | 0.87 (0.38-2.00), p=0.739 | 1.05 (0.58-1.92), p=0.870 |

294

295

296

297

298 **eTable 9: Association between blood peak intensity of five key sphingolipid metabolites and vitamin D**  
 299 **intervention in VDAART children stratified by 17q21 genotype and race; results shown for ages one and**  
 300 **three combined according to a mixed model**

|                                | African American, Black |         | Caucasian+Other |         |
|--------------------------------|-------------------------|---------|-----------------|---------|
|                                | Coefficient             | P-value | Coefficient     | P-value |
| <b>sphinganine-1-phosphate</b> |                         |         |                 |         |
| CC                             | -0.012                  | 0.591   | -0.015          | 0.519   |
| GC                             | 0.024                   | 0.159   | -0.009          | 0.558   |
| GG                             | 0.035                   | 0.136   | 0.053           | 0.120   |
| <b>sphinganine</b>             |                         |         |                 |         |
| CC                             | -0.012                  | 0.791   | 0.012           | 0.718   |
| GC                             | 0.018                   | 0.543   | -0.006          | 0.798   |
| GG                             | 0.073                   | 0.193   | 0.067           | 0.212   |
| <b>sphingosine-1-phosphate</b> |                         |         |                 |         |
| CC                             | -0.011                  | 0.482   | -0.012          | 0.316   |
| GC                             | 0.008                   | 0.454   | -0.003          | 0.720   |
| GG                             | 0.025                   | 0.056   | 0.022           | 0.257   |
| <b>sphingosine</b>             |                         |         |                 |         |
| CC                             | -0.006                  | 0.889   | -0.006          | 0.852   |
| GC                             | 0.007                   | 0.821   | 0.006           | 0.779   |
| GG                             | 0.061                   | 0.228   | 0.058           | 0.190   |
| <b>phos-phoethanolamine</b>    |                         |         |                 |         |
| CC                             | -0.011                  | 0.646   | 0.020           | 0.427   |
| GC                             | -0.001                  | 0.972   | -0.040          | 0.037   |
| GG                             | 0.007                   | 0.792   | 0.069           | 0.033   |

301

302

303 **eTable 10: Results of multivariable interaction models exploring the relationship between a diagnosis of**  
 304 **asthma/recurrent wheeze by age 3 years, the vitamin D intervention, 17q21 genotype and five key**  
 305 **sphingolipids in VDAART. The table shows Beta estimate (p-values) for the multiinteraction term:**  
 306 ***asthma/recurrent wheeze~sphingolipid metabolite\* vitamin D intervention\* genotype*; with additional**  
 307 **adjustment for, or stratification by, race**

|                             |                         | Vitamin D Intervention*rs12936231 genotype*sphingolipid |               |                      |               |                         |
|-----------------------------|-------------------------|---------------------------------------------------------|---------------|----------------------|---------------|-------------------------|
|                             |                         | sphinganine-1-phosphate                                 | sphinganine   | phospho-ethanolamine | sphingosine   | sphingosine-1-phosphate |
| Adjusting for Race Category | YEAR ONE                | -8.5 (0.012)                                            | -1.39 (0.402) | -6.33 (0.015)        | -0.95 (0.605) | -12.95 (0.034)          |
|                             | YEAR THREE              | -6.47 (0.039)                                           | -4.08 (0.025) | -7.31 (0.058)        | -3.69 (0.065) | -9.92 (0.05)            |
| YEAR ONE                    | African American, Black | -4.17 (0.439)                                           | 0.22 (0.926)  | -4.2 (0.304)         | 0.67 (0.785)  | -8.04 (0.377)           |
|                             | Caucasian+Other         | -9.56 (0.036)                                           | -3.13 (0.258) | -5.67 (0.117)        | -2.97 (0.371) | -13.8 (0.103)           |
| YEAR THREE                  | African American, Black | -6.24 (0.165)                                           | -5.35 (0.036) | -10.13 (0.065)       | -4.22 (0.121) | -7.95 (0.247)           |
|                             | Caucasian+Other         | -4.58 (0.331)                                           | -4.3 (0.152)  | -2.76 (0.644)        | -4.92 (0.138) | -10.14 (0.179)          |

308  
 309  
 310  
 311  
 312  
 313  
 314  
 315  
 316  
 317  
 318  
 319  
 320

321 **eTable11: Effect of prenatal vitamin D supplementation on development of asthma/persistent wheeze from 0**  
 322 **to 3 years in the VDAART and COPSAC<sub>2010</sub> trials stratified by genotype of the 17q21 functional SNP**  
 323 **rs12936231; Excluding the children of 256 mothers who additionally received fish-oil supplementation during**  
 324 **pregnancy**  
 325

| Vitamin D vs placebo | COPSAC <sub>2010</sub> ,<br>N=261 |                              | Combined analysis<br>with VDAART     |
|----------------------|-----------------------------------|------------------------------|--------------------------------------|
|                      | total/<br>cases                   | HR (95% CI),<br>p-value      | HR <sup>a</sup> (95% CI),<br>p-value |
| rs12936231<br>strata |                                   |                              |                                      |
| GG                   | 65/9                              | 0.45 (0.11-1.81),<br>p=0.262 | 0.49 (0.24-1.02),<br>p=0.055         |
| GC                   | 139/23                            | 0.56 (0.24-1.30),<br>p=0.178 | 0.71 (0.50-1.01),<br>p=0.060         |
| CC                   | 57/17                             | 0.84 (0.31-2.20),<br>p=0.715 | 1.00 (0.60-1.66),<br>p=0.999         |

326  
 327  
 328  
 329  
 330  
 331  
 332  
 333  
 334  
 335  
 336  
 337  
 338  
 339  
 340  
 341  
 342  
 343  
 344  
 345  
 346  
 347  
 348  
 349



350 **eTable 12: Association between blood peak intensity of five key sphingolipid metabolites and vitamin D**  
 351 **intervention in VDAART children stratified by 17q21 genotype Excluding the children of 256 mothers who**  
 352 **additionally received fish-oil supplementation during pregnancy; results shown for ages one and three**  
 353 **combined according to a mixed model**  
 354

|                                | Excluding all those whose mothers received fish-oil<br>(n=222 included participants) |                |         |
|--------------------------------|--------------------------------------------------------------------------------------|----------------|---------|
|                                | Coefficient                                                                          | 95% CI         | p value |
| <b>sphinganine-1-phosphate</b> |                                                                                      |                |         |
| CC                             | 0.058                                                                                | (-0.152,0.269) | 0.59    |
| GC                             | -0.142                                                                               | (-0.292,0.008) | 0.066   |
| GG                             | 8.8x10 <sup>-5</sup>                                                                 | (-0.215,0.215) | 0.999   |
| <b>sphinganine</b>             |                                                                                      |                |         |
| CC                             | -0.012                                                                               | (-0.4,0.376)   | 0.952   |
| GC                             | 0.004                                                                                | (-0.185,0.193) | 0.965   |
| GG                             | 0.098                                                                                | (-0.239,0.434) | 0.572   |
| <b>sphingosine-1-phosphate</b> |                                                                                      |                |         |
| CC                             | 0.034                                                                                | (-0.183,0.251) | 0.76    |
| GC                             | -0.131                                                                               | (-0.279,0.017) | 0.086   |
| GG                             | -0.062                                                                               | (-0.259,0.136) | 0.543   |
| <b>sphingosine</b>             |                                                                                      |                |         |
| CC                             | -0.095                                                                               | (-0.416,0.226) | 0.564   |
| GC                             | -0.005                                                                               | (-0.229,0.22)  | 0.968   |
| GG                             | -0.082                                                                               | (-0.374,0.21)  | 0.584   |
| <b>phosphoethanolamine</b>     |                                                                                      |                |         |
| CC                             | 0.172                                                                                | (-0.08,0.424)  | 0.188   |
| GC                             | -0.04                                                                                | (-0.19,0.109)  | 0.599   |
| GG                             | 0.028                                                                                | (-0.206,0.262) | 0.816   |

355  
 356  
 357

358 **eTable 13: Results of multivariable interaction models exploring the relationship between a diagnosis of**  
359 **asthma/recurrent wheeze by age 3 years, the vitamin D intervention, 17q21 genotype and five key**  
360 **sphingolipids in VDAART. The table shows Beta estimate (p-values) for the multiinteraction term:**  
361 ***asthma/recurrent wheeze~sphingolipid metabolite\* vitamin D intervention\* genotype*; with additional**  
362 **adjustment for, or stratification by, race**

|                                                                           | <b>Sphinganine-1-phosphate</b> | <b>Sphinganine</b> | <b>Phosphoethanolamine</b> | <b>Sphingosine</b> | <b>Sphingosine-1-phosphate</b> |
|---------------------------------------------------------------------------|--------------------------------|--------------------|----------------------------|--------------------|--------------------------------|
| <b>Sphingolipid Metabolite</b>                                            | -0.23 (0.82)                   | -0.34 (0.565)      | 0.4 (0.76)                 | 0.25 (0.704)       | -0.08 (0.946)                  |
| <b>Vitamin D Intervention</b>                                             | -1.13 (0.086)                  | -1.06 (0.126)      | -1.16 (0.081)              | -1.11 (0.096)      | -1.15 (0.081)                  |
| <b>rs12936231 genotype</b>                                                | 0.14 (0.673)                   | 0.16 (0.635)       | 0.12 (0.73)                | 0.1 (0.755)        | 0.13 (0.691)                   |
| <b>Vitamin D Intervention*Sphingolipid metabolite</b>                     | 0.17 (0.92)                    | -0.18 (0.867)      | -0.27 (0.873)              | -0.16 (0.902)      | 0.59 (0.746)                   |
| <b>Vitamin D Intervention*rs12936231 genotype</b>                         | 0.54 (0.291)                   | 0.42 (0.453)       | 0.52 (0.333)               | 0.49 (0.356)       | 0.55 (0.288)                   |
| <b>rs12936231 genotype*Sphingolipid metabolite</b>                        | 0.13 (0.876)                   | 0.61 (0.235)       | -0.22 (0.818)              | 0.09 (0.869)       | 0 (0.997)                      |
| <b>Vitamin D Intervention*rs12936231 genotype*Sphingolipid metabolite</b> | -0.15 (0.917)                  | -1.22 (0.151)      | -0.88 (0.518)              | -0.97 (0.344)      | -0.85 (0.579)                  |

363  
364  
365  
366  
367  
368  
369  
370  
371  
372  
373  
374  
375  
376  
377  
378  
379

380  
381  
382  
383  
384  
385  
386  
387  
388  
389  
390  
391  
392  
393  
394  
395  
396  
397  
398  
399  
400  
401  
402  
403  
404  
405  
406

## References

1. Litonjua, A.A., Lange, N.E., Carey, V.J., Brown, S., Laranjo, N., O'Connor, G.T., Sandel, M., Strunk, R.C., Bacharier, L.B., Zeiger, R.S., et al. (2014). The Vitamin D Antenatal Asthma Reduction Trial (VDAART): Rationale, design, and methods of a randomized, controlled trial of vitamin D supplementation in pregnancy for the primary prevention of asthma and allergies in children. *Contemporary clinical trials* 38, 37-50.
2. Bisgaard, H. (2004). The Copenhagen Prospective Study on Asthma in Childhood (COPSAC): design, rationale, and baseline data from a longitudinal birth cohort study. *Annals of Allergy, Asthma & Immunology* 93, 381-389.
3. Bisgaard, H., Hermansen, M.N., Loland, L., Halkjaer, L.B., and Buchvald, F. (2006). Intermittent Inhaled Corticosteroids in Infants with Episodic Wheezing. *New England Journal of Medicine* 354, 1998-2005.
4. Bisgaard, H., Bonnelykke, K., Sleiman, P.M., Brasholt, M., Chawes, B., Kreiner-Moller, E., Stage, M., Kim, C., Tavendale, R., Baty, F., et al. (2009). Chromosome 17q21 gene variants are associated with asthma and exacerbations but not atopy in early childhood. *Am J Respir Crit Care Med* 179, 179-185.
5. Miller, M., Rosenthal, P., Beppu, A., Mueller, J.L., Hoffman, H.M., Tam, A.B., Doherty, T.A., McGeough, M.D., Pena, C.A., Suzukawa, M., et al. (2014). ORMDL3 transgenic mice have increased airway remodeling and airway responsiveness characteristic of asthma. *Journal of immunology (Baltimore, Md : 1950)* 192, 3475-3487.
6. Ono, J.G., Worgall, T.S., and Worgall, S. (2015). Airway reactivity and sphingolipids—implications for childhood asthma. *Molecular and Cellular Pediatrics* 2, 1-6.
7. Worgall, T.S., Veerappan, A., Sung, B., Kim, B.I., Weiner, E., Bholah, R., Silver, R.B., Jiang, X.C., and Worgall, S. (2013). Impaired sphingolipid synthesis in the respiratory tract induces airway hyperreactivity. *Science translational medicine* 5, 186ra167.
